# Supplementary material for: A heterozygous IDH1R132H/WT mutation induces genome-wide alterations in DNA methylation
Source: HighWire-hosted journal article supplement (doi:10.1101/gr.132738.111), 2012-08-16
Supplement: Sup_Table2.xlsx [file Sup_Table2.xlsx]

## Sheet: Supplementary Table 2
Supplementary Table 2. Gene ontology biological processes associated with HCT116IDH1/WT hypermethylated genes
GOID	Term	Count	Size	ExpCount	OddsRatio	HCT116 p-value	TCGA p-value	Turcan et al. p-value
GO:0007267	cell-cell signaling	198	909	114.487	2.08079	4.73e-16	0.0858477	2.10008e-09
GO:0007186	G-protein coupled receptor protein signaling pathway	130	524	65.997	2.41737	3.85e-15	0.000234186	1.96657e-10
GO:0003008	system process	255	1317	165.874	1.80923	6.25e-14	0.00445604	4.01638e-16
GO:0050896	response to stimulus	789	5245	660.6	1.50437	2.75e-13	3.6503e-06	3.23851e-17
GO:0009605	response to external stimulus	211	1049	132.12	1.87525	3.06e-13	0.00293168	1.60742e-07
GO:0032501	multicellular organismal process	679	4401	554.3	1.50212	5.33e-13	1.97778e-05	1.78772e-23
GO:0007154	cell communication	591	3740	471.048	1.51199	8.21e-13	1.11953e-06	5.90914e-13
GO:0023052	signaling	578	3651	459.838	1.50906	1.33e-12	2.32565e-06	2.45835e-12
GO:0051239	regulation of multicellular organismal process	234	1265	159.325	1.68629	1.07e-10	0.117316	2.01338e-09
GO:0042221	response to chemical stimulus	367	2196	276.583	1.52625	2.18e-10	7.91303e-05	1.74844e-14
GO:0050877	neurological system process	185	957	120.533	1.76045	3.76e-10	0.00821975	1.77726e-09
GO:0032879	regulation of localization	180	938	118.14	1.74023	1.23e-09	0.0590417	3.27708e-09
GO:0007166	cell surface receptor linked signaling pathway	305	1792	225.7	1.5368	1.81e-09	3.40868e-05	2.52117e-11
GO:0019226	transmission of nerve impulse	125	596	75.0653	1.92153	2.53e-09	0.0127612	3.96872e-08
GO:0035637	multicellular organismal signaling	125	596	75.0653	1.92153	2.53e-09	0.0127612	3.96872e-08
GO:0007268	synaptic transmission	113	537	67.6344	1.92163	1.27e-08	0.0349856	4.59964e-07
GO:0051049	regulation of transport	135	688	86.6526	1.76574	4.55e-08	0.438352	1.8965e-08
GO:0065008	regulation of biological quality	316	1928	242.829	1.46136	5.43e-08	0.0346272	1.92818e-08
GO:0046903	secretion	127	645	81.2368	1.76909	9.57e-08	0.269323	5.29717e-10
GO:0006935	chemotaxis	104	502	63.2262	1.87653	1.14e-07	0.0470046	0.00397772
GO:0042330	taxis	104	502	63.2262	1.87653	1.14e-07	0.0470046	0.00397772
GO:0007610	behavior	83	376	47.3567	2.02477	1.4e-07	0.133718	5.17328e-05
GO:0040011	locomotion	172	951	119.777	1.60424	2.33e-07	0.00137992	1.80967e-06
GO:0007165	signal transduction	491	3246	408.829	1.35882	2.48e-07	2.43361e-05	3.72263e-09
GO:0007399	nervous system development	228	1338	168.519	1.50524	3.1e-07	0.261908	0.0219112
GO:0032101	regulation of response to external stimulus	60	250	31.4871	2.24315	4.14e-07	0.0264756	0.000670441
GO:0032940	secretion by cell	108	540	68.0122	1.79435	4.14e-07	0.638063	1.84761e-06
GO:0048731	system development	413	2677	337.164	1.37249	4.39e-07	0.144728	2.37575e-09
GO:0044057	regulation of system process	77	350	44.082	2.01129	4.59e-07	0.619948	6.81057e-06
GO:0003001	generation of a signal involved in cell-cell signaling	62	264	33.2504	2.18072	5.97e-07	0.784431	0.000410718
GO:0023061	signal release	62	264	33.2504	2.18072	5.97e-07	0.784431	0.000410718
GO:0048856	anatomical structure development	453	2983	375.704	1.35346	6.26e-07	0.064052	1.62023e-10
GO:0009190	cyclic nucleotide biosynthetic process	38	137	17.2549	2.70871	1.41e-06	0.0731949	5.79078e-05
GO:0060193	positive regulation of lipase activity	33	112	14.1062	2.94329	1.6e-06	0.00235949	4.96654e-08
GO:0032502	developmental process	512	3454	435.026	1.32185	1.79e-06	0.0363911	1.15343e-11
GO:0007275	multicellular organismal development	466	3114	392.204	1.3267	2.42e-06	0.104467	5.21719e-10
GO:0009611	response to wounding	161	912	114.865	1.54896	2.71e-06	0.00225661	1.2905e-07
GO:0006936	muscle contraction	52	218	27.4568	2.21775	2.94e-06	0.138129	3.89186e-07
GO:0045723	positive regulation of fatty acid biosynthetic process	9	13	1.63733	15.7061	3.46e-06		0.181018
GO:0048468	cell development	185	1081	136.15	1.49648	3.67e-06	0.441538	0.0414488
GO:0010518	positive regulation of phospholipase activity	31	106	13.3505	2.90942	3.91e-06	0.00263103	2.70645e-08
GO:0060191	regulation of lipase activity	36	132	16.6252	2.64338	4.07e-06	0.00441539	1.12601e-06
GO:0030182	neuron differentiation	137	758	95.469	1.58665	4.59e-06	0.138899	0.271122
GO:0030799	regulation of cyclic nucleotide metabolic process	35	128	16.1214	2.65177	5.18e-06	0.112428	8.62614e-05
GO:0030802	regulation of cyclic nucleotide biosynthetic process	34	123	15.4917	2.69096	5.43e-06	0.0842461	9.14578e-05
GO:0030808	regulation of nucleotide biosynthetic process	34	123	15.4917	2.69096	5.43e-06	0.0842461	9.14578e-05
GO:0006939	smooth muscle contraction	22	64	8.06071	3.67588	5.63e-06	0.215693	0.000397849
GO:0006171	cAMP biosynthetic process	33	118	14.8619	2.73388	5.65e-06	0.102032	4.49926e-05
GO:0009187	cyclic nucleotide metabolic process	40	156	19.648	2.4327	6.41e-06	0.0843687	0.000129362
GO:0030595	leukocyte chemotaxis	26	84	10.5797	3.14963	7.49e-06	0.0497798	0.000839944
GO:0007202	activation of phospholipase C activity	29	99	12.4689	2.91347	7.68e-06	0.00258911	8.07241e-08
GO:0007218	neuropeptide signaling pathway	24	75	9.44614	3.30406	8.83e-06	0.523095	0.00537333
GO:0003012	muscle system process	54	239	30.1017	2.0655	1.06e-05	0.157041	1.48425e-06
GO:0010517	regulation of phospholipase activity	31	111	13.9803	2.72621	1.11e-05	0.00465167	9.08653e-08
GO:0030154	cell differentiation	308	1980	249.378	1.35385	1.16e-05	0.0735647	1.21642e-09
GO:0010863	positive regulation of phospholipase C activity	29	101	12.7208	2.83197	1.18e-05	0.00330434	6.91312e-08
GO:0022008	neurogenesis	150	860	108.316	1.52018	1.2e-05	0.268625	0.139694
GO:0007155	cell adhesion	133	745	93.8317	1.5597	1.21e-05	0.000582099	3.37089e-11
GO:0022610	biological adhesion	133	745	93.8317	1.5597	1.21e-05	0.000582099	3.37089e-11
GO:0051480	cytosolic calcium ion homeostasis	38	149	18.7663	2.41295	1.24e-05	0.282905	0.000312166
GO:0051716	cellular response to stimulus	567	3933	495.356	1.27825	1.44e-05	0.000991342	7.48039e-07
GO:0006811	ion transport	140	795	100.129	1.53519	1.46e-05	1.10999e-05	1.08366e-11
GO:0072503	cellular divalent inorganic cation homeostasis	49	213	26.827	2.11117	1.61e-05	0.0773928	0.00102905
GO:0006955	immune response	147	846	106.552	1.5115	1.82e-05	5.03057e-05	8.25184e-09
GO:0072507	divalent inorganic cation homeostasis	50	220	27.7087	2.07845	1.88e-05	0.0723218	0.00203689
GO:0009582	detection of abiotic stimulus	18	50	6.29743	3.94026	1.92e-05	0.903603	0.016427
GO:0051179	localization	486	3322	418.401	1.28526	1.93e-05	3.34777e-06	1.76182e-05
GO:0043269	regulation of ion transport	37	147	18.5144	2.36937	2.2e-05	0.186405	2.00948e-07
GO:0048167	regulation of synaptic plasticity	22	69	8.69045	3.28318	2.21e-05	0.937171	0.362876
GO:0007417	central nervous system development	97	515	64.8635	1.65438	2.28e-05	0.932533	0.569182
GO:0030817	regulation of cAMP biosynthetic process	31	115	14.4841	2.59535	2.4e-05	0.0850112	8.55442e-05
GO:0051969	regulation of transmission of nerve impulse	39	159	20.0258	2.29027	2.53e-05	0.909941	0.0949653
GO:0046058	cAMP metabolic process	33	126	15.8695	2.4967	2.53e-05	0.100539	0.000207107
GO:0043627	response to estrogen stimulus	37	148	18.6404	2.34778	2.58e-05	0.0315244	0.00012948
GO:0009888	tissue development	153	893	112.472	1.48637	2.61e-05	0.458037	1.40856e-08
GO:0031279	regulation of cyclase activity	28	100	12.5949	2.73238	2.76e-05	0.151922	9.57901e-05
GO:0030814	regulation of cAMP metabolic process	31	116	14.61	2.56456	2.88e-05	0.090466	0.000114516
GO:0015833	peptide transport	38	155	19.522	2.28783	3.23e-05	0.828788	0.00861408
GO:0055082	cellular chemical homeostasis	90	474	59.6996	1.66815	3.29e-05	0.00771617	4.22679e-06
GO:0048699	generation of neurons	141	815	102.648	1.50068	3.4e-05	0.203952	0.240438
GO:0019935	cyclic-nucleotide-mediated signaling	37	150	18.8923	2.30577	3.54e-05	0.060064	6.33178e-06
GO:0010959	regulation of metal ion transport	33	128	16.1214	2.44364	3.58e-05	0.172858	1.58656e-06
GO:0043410	positive regulation of MAPKKK cascade	33	128	16.1214	2.44364	3.58e-05	0.172858	1.90986e-05
GO:0048878	chemical homeostasis	114	634	79.8514	1.5661	3.78e-05	0.0105509	7.08557e-07
GO:0051924	regulation of calcium ion transport	29	107	13.4765	2.61255	3.89e-05	0.560512	7.81515e-05
GO:0006954	inflammatory response	71	355	44.7117	1.77294	4.09e-05	0.00648357	1.66331e-05
GO:0051925	regulation of calcium ion transport via voltage-gated calcium channel activity	14	35	4.4082	4.662	4.18e-05	0.719	0.00105585
GO:0030073	insulin secretion	33	129	16.2474	2.41794	4.24e-05	0.929019	0.0203705
GO:0003013	circulatory system process	56	263	33.1245	1.91282	4.46e-05	0.0507519	2.85966e-09
GO:0008015	blood circulation	56	263	33.1245	1.91282	4.46e-05	0.0507519	2.85966e-09
GO:0050801	ion homeostasis	92	491	61.8407	1.64098	4.54e-05	0.00527529	1.47941e-07
GO:0048869	cellular developmental process	315	2065	260.084	1.31867	4.67e-05	0.0398246	2.40154e-10
GO:0060326	cell chemotaxis	29	108	13.6024	2.57922	4.69e-05	0.028811	0.000927796
GO:0006952	defense response	146	855	107.686	1.47732	4.8e-05	0.00491289	3.39273e-07
GO:0010740	positive regulation of intracellular protein kinase cascade	59	282	35.5175	1.87169	4.81e-05	0.025167	0.00011783
GO:0051339	regulation of lyase activity	28	103	12.9727	2.6223	4.96e-05	0.178662	0.000238991
GO:0045761	regulation of adenylate cyclase activity	27	98	12.343	2.67029	5.21e-05	0.135366	4.97255e-05
GO:0051046	regulation of secretion	67	333	41.9409	1.78438	5.52e-05	0.706338	1.08067e-05
GO:0031644	regulation of neurological system process	40	170	21.4113	2.16765	5.53e-05	0.94681	0.0853062
GO:0009914	hormone transport	41	176	22.1669	2.14	5.72e-05	0.930374	0.00993861
GO:0016477	cell migration	108	600	75.5691	1.56567	5.8e-05	0.00108779	4.10501e-06
GO:0002237	response to molecule of bacterial origin	40	171	21.5372	2.15089	6.36e-05	0.00983483	9.99436e-05
GO:0002790	peptide secretion	35	143	18.0106	2.28002	6.77e-05	0.888455	0.0290622
GO:0010033	response to organic substance	207	1290	162.474	1.38106	6.9e-05	0.00189019	5.95761e-08
GO:0007187	G-protein signaling, coupled to cyclic nucleotide second messenger	33	132	16.6252	2.34396	6.93e-05	0.13866	2.93105e-05
GO:0051270	regulation of cellular component movement	61	299	37.6586	1.81302	7.78e-05	0.00242012	1.61078e-05
GO:0009617	response to bacterium	52	244	30.7314	1.91237	8.06e-05	0.0189227	0.000144566
GO:0040007	growth	105	585	73.6799	1.5587	8.27e-05	0.505592	0.0194212
GO:0007600	sensory perception	71	363	45.7193	1.72295	8.56e-05	0.022414	0.0016139
GO:0040012	regulation of locomotion	61	300	37.7846	1.80525	8.59e-05	0.00150762	3.26589e-05
GO:0009653	anatomical structure morphogenesis	240	1532	192.953	1.34675	8.6e-05	0.059176	7.54867e-09
GO:0030072	peptide hormone secretion	34	139	17.5068	2.27723	8.66e-05	0.922216	0.0543168
GO:0050727	regulation of inflammatory response	30	117	14.736	2.42257	8.88e-05	0.327935	0.0114199
GO:0006874	cellular calcium ion homeostasis	45	203	25.5676	2.00792	9.1e-05	0.0718073	0.000780618
GO:0010817	regulation of hormone levels	62	307	38.6662	1.79011	9.26e-05	0.733681	0.00903264
GO:0007156	homophilic cell adhesion	26	96	12.0911	2.60655	9.74e-05	0.00922069	0.0148765
GO:0007200	activation of phospholipase C activity by G-protein coupled receptor protein signaling pathway coupled to IP3 second messenger	17	51	6.42338	3.4993	0.000100043	0.0345472	0.000281228
GO:0045923	positive regulation of fatty acid metabolic process	11	25	3.14871	5.48684	0.00010015		0.112929
GO:0051050	positive regulation of transport	66	333	41.9409	1.74971	0.000100262	0.423577	0.000188426
GO:0006873	cellular ion homeostasis	84	449	56.5509	1.63397	0.000102149	0.0114248	2.89235e-06
GO:0006164	purine nucleotide biosynthetic process	49	228	28.7163	1.93131	0.000102944	0.0708133	0.00186779
GO:0055074	calcium ion homeostasis	46	210	26.4492	1.97766	0.000103275	0.0670795	0.00160568
GO:0006140	regulation of nucleotide metabolic process	63	315	39.6738	1.76846	0.000109316	0.139112	0.000395069
GO:0048666	neuron development	109	616	77.5843	1.53215	0.000109724	0.222919	0.206374
GO:0009581	detection of external stimulus	19	61	7.68286	3.16794	0.000112495	0.449698	0.0176311
GO:0019933	cAMP-mediated signaling	29	113	14.2322	2.42447	0.000113708	0.191963	2.0705e-05
GO:0030334	regulation of cell migration	56	272	34.258	1.83144	0.000116963	0.00104587	1.04158e-05
GO:0010647	positive regulation of cell communication	96	530	66.7527	1.57317	0.000117848	0.085419	3.57359e-06
GO:0048168	regulation of neuronal synaptic plasticity	14	38	4.78604	4.07803	0.000120658	0.91641	0.379138
GO:0046879	hormone secretion	39	170	21.4113	2.09562	0.000121868	0.94681	0.0145844
GO:0050804	regulation of synaptic transmission	35	147	18.5144	2.1977	0.000122715	0.847655	0.0488454
GO:0072511	divalent inorganic cation transport	45	206	25.9454	1.96991	0.000130774	0.569324	0.000166529
GO:0007194	negative regulation of adenylate cyclase activity	17	52	6.54932	3.39898	0.000131398	0.457225	0.00643643
GO:0031280	negative regulation of cyclase activity	17	52	6.54932	3.39898	0.000131398	0.457225	0.00643643
GO:0009124	nucleoside monophosphate biosynthetic process	38	165	20.7815	2.10555	0.000135905	0.0555815	8.60069e-05
GO:0042592	homeostatic process	148	888	111.842	1.43225	0.000142893	0.142897	0.000732635
GO:0032409	regulation of transporter activity	20	67	8.43855	2.98052	0.000144666	0.55173	7.30747e-05
GO:0023056	positive regulation of signaling	96	533	67.1306	1.56188	0.000145891	0.0929721	3.64778e-06
GO:0010646	regulation of cell communication	170	1043	131.364	1.39827	0.000147963	0.116509	1.20046e-05
GO:0051336	regulation of hydrolase activity	97	540	68.0122	1.55695	0.000149272	0.00338001	1.12663e-07
GO:0070838	divalent metal ion transport	44	202	25.4416	1.9619	0.000165541	0.531453	7.2111e-05
GO:0035249	synaptic transmission, glutamatergic	14	39	4.91199	3.91452	0.000166615	0.785208	0.558967
GO:0010700	negative regulation of norepinephrine secretion	5	6	0.755691	34.8158	0.000169232	0.481939	0.269584
GO:0014060	regulation of epinephrine secretion	5	6	0.755691	34.8158	0.000169232	0.481939	0.269584
GO:0051350	negative regulation of lyase activity	17	53	6.67527	3.30423	0.000171025	0.476107	0.00868269
GO:0032496	response to lipopolysaccharide	37	161	20.2777	2.09889	0.000173278	0.0260243	0.000222058
GO:0023051	regulation of signaling	226	1447	182.248	1.3373	0.000173303	0.0211872	3.47032e-06
GO:0007204	elevation of cytosolic calcium ion concentration	33	138	17.3809	2.20869	0.00017357	0.358532	0.000552662
GO:0019725	cellular homeostasis	96	536	67.5084	1.55074	0.000179939	0.0247447	4.3043e-05
GO:0032355	response to estradiol stimulus	25	94	11.8392	2.54108	0.000180231	0.384518	0.00999508
GO:0090257	regulation of muscle system process	24	89	11.2094	2.58878	0.000191499	0.316772	2.88898e-05
GO:0045664	regulation of neuron differentiation	49	234	29.472	1.86753	0.000200034	0.791463	0.951025
GO:0006816	calcium ion transport	40	180	22.6707	2.01079	0.000206982	0.505317	6.64534e-05
GO:0006810	transport	400	2742	345.351	1.25625	0.000210445	0.000577308	0.00036977
GO:0006928	cellular component movement	139	833	104.915	1.43148	0.000217212	0.00411755	7.50928e-06
GO:0007270	neuron-neuron synaptic transmission	21	74	9.32019	2.77553	0.000219544	0.793625	0.0752116
GO:0014061	regulation of norepinephrine secretion	7	12	1.51138	9.75811	0.000220377	0.731711	0.0111079
GO:0048584	positive regulation of response to stimulus	132	785	98.8696	1.44336	0.00022466	0.0365529	1.93449e-05
GO:0045834	positive regulation of lipid metabolic process	20	69	8.69045	2.85829	0.000225191	0.8565	0.000402632
GO:0022898	regulation of transmembrane transporter activity	18	59	7.43096	3.07255	0.000226632	0.584187	0.000143566
GO:2000145	regulation of cell motility	56	279	35.1396	1.77268	0.000234615	0.00177137	4.13093e-05
GO:0007603	phototransduction, visible light	6	9	1.13354	13.9332	0.000236378	0.0581097	0.108119
GO:0031392	regulation of prostaglandin biosynthetic process	4	4	0.503794	Inf	0.000250723		0.361471
GO:0031394	positive regulation of prostaglandin biosynthetic process	4	4	0.503794	Inf	0.000250723		0.361471
GO:0048870	cell motility	110	636	80.1033	1.48849	0.000256618	0.00187374	7.20517e-06
GO:0051674	localization of cell	110	636	80.1033	1.48849	0.000256618	0.00187374	7.20517e-06
GO:0032103	positive regulation of response to external stimulus	27	107	13.4765	2.36774	0.000260469	0.0134977	0.000718513
GO:0048732	gland development	45	212	26.7011	1.89798	0.000260595	0.623953	0.0619462
GO:0048812	neuron projection morphogenesis	85	468	58.9439	1.57394	0.000261487	0.111594	0.281703
GO:0051272	positive regulation of cellular component movement	39	176	22.1669	2.00263	0.000262791	0.00112016	0.000302531
GO:0051051	negative regulation of transport	41	188	23.6783	1.96292	0.000265083	0.585048	0.000213034
GO:0006937	regulation of muscle contraction	21	75	9.44614	2.72386	0.000269309	0.248142	1.35795e-05
GO:0032412	regulation of ion transmembrane transporter activity	17	55	6.92717	3.1297	0.000282441	0.688435	0.00054561
GO:0070374	positive regulation of ERK1 and ERK2 cascade	17	55	6.92717	3.1297	0.000282441	0.688435	0.00726677
GO:0044283	small molecule biosynthetic process	105	604	76.0729	1.49636	0.000291418	0.0172752	5.81378e-07
GO:0009123	nucleoside monophosphate metabolic process	41	189	23.8043	1.94946	0.000298255	0.0336447	8.16667e-05
GO:0072522	purine-containing compound biosynthetic process	49	238	29.9758	1.82727	0.00030459	0.0758264	0.00231633
GO:0007193	inhibition of adenylate cyclase activity by G-protein signaling pathway	14	41	5.16389	3.62383	0.000305087	0.248619	0.0116324
GO:0030335	positive regulation of cell migration	37	166	20.9075	2.01652	0.000330803	0.000842716	0.000367702
GO:0050900	leukocyte migration	43	202	25.4416	1.9037	0.00033136	0.00558798	7.25154e-07
GO:0006959	humoral immune response	23	87	10.9575	2.51815	0.000353812	0.0636713	0.00019636
GO:0030001	metal ion transport	89	500	62.9743	1.53579	0.000379777	0.0116421	7.1254e-07
GO:2000147	positive regulation of cell motility	37	168	21.1594	1.98533	0.000423338	0.00103498	0.00055954
GO:0048243	norepinephrine secretion	7	13	1.63733	8.13094	0.0004256	0.759587	0.0211586
GO:0007188	G-protein signaling, coupled to cAMP nucleotide second messenger	25	99	12.4689	2.3682	0.000428415	0.143513	4.85002e-06
GO:0050880	regulation of blood vessel size	24	94	11.8392	2.40266	0.00046543	0.173745	1.18667e-05
GO:0050433	regulation of catecholamine secretion	11	29	3.65251	4.26584	0.00048119	0.591721	0.149109
GO:0051234	establishment of localization	403	2792	351.648	1.23673	0.000490995	0.000645322	0.000957222
GO:0019932	second-messenger-mediated signaling	58	300	37.7846	1.691	0.000502792	0.0400778	1.94748e-05
GO:2000026	regulation of multicellular organismal development	127	765	96.3506	1.4182	0.000504327	0.440999	0.00294504
GO:0065007	biological regulation	913	6793	855.568	1.21089	0.000527058	0.588676	0.0542701
GO:0051966	regulation of synaptic transmission, glutamatergic	10	25	3.14871	4.65179	0.000529316	0.4886	0.520902
GO:0010896	regulation of triglyceride catabolic process	5	7	0.88164	17.4062	0.000530536	0.15914	0.135842
GO:0030432	peristalsis	5	7	0.88164	17.4062	0.000530536	0.535739	0.369891
GO:0046643	regulation of gamma-delta T cell activation	5	7	0.88164	17.4062	0.000530536		0.0319842
GO:0046645	positive regulation of gamma-delta T cell activation	5	7	0.88164	17.4062	0.000530536		0.0319842
GO:0048242	epinephrine secretion	5	7	0.88164	17.4062	0.000530536	0.535739	0.135842
GO:0060638	mesenchymal-epithelial cell signaling	5	7	0.88164	17.4062	0.000530536		0.686226
GO:0050793	regulation of developmental process	155	963	121.288	1.3711	0.000531253	0.20134	5.02183e-06
GO:0051240	positive regulation of multicellular organismal process	67	359	45.2155	1.62116	0.000536008	0.0555797	8.19529e-05
GO:0035150	regulation of tube size	24	95	11.9651	2.36858	0.000549796	0.18345	1.72522e-05
GO:0050767	regulation of neurogenesis	55	282	35.5175	1.70842	0.000557356	0.826613	0.826473
GO:0051896	regulation of protein kinase B signaling cascade	16	53	6.67527	3.02339	0.00056793	0.179697	0.0179602
GO:0046889	positive regulation of lipid biosynthetic process	12	34	4.28225	3.80866	0.00057885	0.976045	0.0690002
GO:0003018	vascular process in circulatory system	26	107	13.4765	2.25008	0.000628366	0.316739	6.16243e-06
GO:0008217	regulation of blood pressure	26	107	13.4765	2.25008	0.000628366	0.0264821	0.000718513
GO:0040008	regulation of growth	72	394	49.6237	1.5807	0.00063183	0.518219	0.0563457
GO:0007611	learning or memory	28	119	14.9879	2.15776	0.000687984	0.466464	0.00583737
GO:0045666	positive regulation of neuron differentiation	15	49	6.17148	3.0833	0.000711679	0.399779	0.866901
GO:0050789	regulation of biological process	865	6419	808.464	1.20157	0.000719857	0.876283	0.136085
GO:0015874	norepinephrine transport	7	14	1.76328	6.96868	0.000758904	0.784568	0.00984203
GO:0042304	regulation of fatty acid biosynthetic process	10	26	3.27466	4.36062	0.000763922	0.768131	0.143584
GO:0021983	pituitary gland development	12	35	4.4082	3.6427	0.000781091	0.719	0.0875587
GO:0031175	neuron projection development	94	545	68.642	1.47751	0.000781945	0.195296	0.172158
GO:0051241	negative regulation of multicellular organismal process	49	248	31.2352	1.73368	0.000809788	0.0237334	3.67837e-05
GO:0051048	negative regulation of secretion	23	92	11.5873	2.33451	0.000831233	0.0921515	0.000420749
GO:0051960	regulation of nervous system development	58	306	38.5403	1.64908	0.000836577	0.885193	0.715712
GO:0031099	regeneration	26	109	13.7284	2.19542	0.000846704	0.586073	0.0203369
GO:0040017	positive regulation of locomotion	37	174	21.915	1.89723	0.000853544	0.00185876	0.000619135
GO:0008037	cell recognition	16	55	6.92717	2.86777	0.000891241	0.344073	0.756765
GO:0010627	regulation of intracellular protein kinase cascade	75	419	52.7724	1.54113	0.000908515	0.0543474	0.000121466
GO:0050432	catecholamine secretion	11	31	3.9044	3.83849	0.000927355	0.637949	0.124845
GO:0009165	nucleotide biosynthetic process	52	269	33.8802	1.68775	0.000961116	0.0663202	0.000906906
GO:0060627	regulation of vesicle-mediated transport	32	145	18.2625	1.98711	0.000968818	0.971105	0.0168431
GO:0034220	ion transmembrane transport	48	244	30.7314	1.72358	0.00100445	0.067839	0.00240514
GO:0007612	learning	18	66	8.3126	2.62263	0.0010124	0.828673	0.083778
GO:0022603	regulation of anatomical structure morphogenesis	71	394	49.6237	1.55263	0.00102133	0.216956	0.0126184
GO:0034370	triglyceride-rich lipoprotein particle remodeling	6	11	1.38543	8.35828	0.00103763	0.097722	0.226915
GO:0034372	very-low-density lipoprotein particle remodeling	6	11	1.38543	8.35828	0.00103763	0.097722	0.226915
GO:0042354	L-fucose metabolic process	6	11	1.38543	8.35828	0.00103763	0.318815	0.452326
GO:0048016	inositol phosphate-mediated signaling	17	61	7.68286	2.7013	0.0010637	0.0474064	0.00012129
GO:0051897	positive regulation of protein kinase B signaling cascade	13	41	5.16389	3.24221	0.00110442	0.248619	0.0515161
GO:0051952	regulation of amine transport	13	41	5.16389	3.24221	0.00110442	0.0568685	0.0255529
GO:0009586	rhodopsin mediated phototransduction	4	5	0.629743	27.8333	0.00112761	0.0870229	0.17304
GO:0021826	substrate-independent telencephalic tangential migration	4	5	0.629743	27.8333	0.00112761	0.00949538	0.0336589
GO:0021830	interneuron migration from the subpallium to the cortex	4	5	0.629743	27.8333	0.00112761	0.00949538	0.0336589
GO:0021843	substrate-independent telencephalic tangential interneuron migration	4	5	0.629743	27.8333	0.00112761	0.00949538	0.0336589
GO:0021853	cerebral cortex GABAergic interneuron migration	4	5	0.629743	27.8333	0.00112761	0.00949538	0.0336589
GO:0021894	cerebral cortex GABAergic interneuron development	4	5	0.629743	27.8333	0.00112761	0.00949538	0.0336589
GO:0032811	negative regulation of epinephrine secretion	4	5	0.629743	27.8333	0.00112761	0.421911	0.17304
GO:0007631	feeding behavior	19	72	9.06829	2.50767	0.00114628	0.210075	0.00109448
GO:0060284	regulation of cell development	65	356	44.8377	1.57605	0.00116216	0.781538	0.587598
GO:0070848	response to growth factor stimulus	28	123	15.4917	2.06607	0.00118959	0.74285	0.296072
GO:0051606	detection of stimulus	29	129	16.2474	2.03328	0.00120961	0.796205	0.0960177
GO:0008038	neuron recognition	9	23	2.89682	4.48298	0.00121306	0.705646	0.987001
GO:0034367	macromolecular complex remodeling	9	23	2.89682	4.48298	0.00121306	0.211026	0.06403
GO:0034368	protein-lipid complex remodeling	9	23	2.89682	4.48298	0.00121306	0.211026	0.06403
GO:0034369	plasma lipoprotein particle remodeling	9	23	2.89682	4.48298	0.00121306	0.211026	0.06403
GO:0009967	positive regulation of signal transduction	86	498	62.7224	1.477	0.00124153	0.0409683	1.84015e-05
GO:0002673	regulation of acute inflammatory response	11	32	4.03035	3.65534	0.00125427	0.233909	0.0401564
GO:0030593	neutrophil chemotaxis	11	32	4.03035	3.65534	0.00125427	0.107963	0.000737491
GO:0051588	regulation of neurotransmitter transport	11	32	4.03035	3.65534	0.00125427	0.428244	0.00237713
GO:0060341	regulation of cellular localization	78	444	55.9212	1.50631	0.00126022	0.763764	4.66835e-05
GO:0033604	negative regulation of catecholamine secretion	5	8	1.00759	11.603	0.0012677	0.583956	0.467155
GO:0046629	gamma-delta T cell activation	5	8	1.00759	11.603	0.0012677		0.0638994
GO:0048241	epinephrine transport	5	8	1.00759	11.603	0.0012677	0.583956	0.207785
GO:0048583	regulation of response to stimulus	248	1660	209.075	1.26427	0.00126903	0.000429672	4.83888e-07
GO:0009719	response to endogenous stimulus	115	699	88.038	1.39828	0.0012863	0.0125383	5.84219e-07
GO:0050796	regulation of insulin secretion	26	112	14.1062	2.1182	0.00129709	0.980045	0.0747333
GO:0006940	regulation of smooth muscle contraction	12	37	4.6601	3.35061	0.00136403	0.337971	0.000897482
GO:0007601	visual perception	36	173	21.7891	1.84464	0.00149358	0.433237	0.0451142
GO:0006812	cation transport	94	557	70.1533	1.43741	0.00158897	0.00506098	1.1603e-06
GO:0032844	regulation of homeostatic process	37	180	22.6707	1.81652	0.00162965	0.849441	0.0932017
GO:0050920	regulation of chemotaxis	19	74	9.32019	2.416	0.00163011	0.0398032	0.0152985
GO:0050953	sensory perception of light stimulus	36	174	21.915	1.83109	0.00166055	0.348881	0.0358782
GO:0042127	regulation of cell proliferation	145	917	115.495	1.33732	0.0016875	0.0550252	8.33164e-06
GO:0050890	cognition	28	126	15.8695	2.00222	0.00175013	0.435893	0.00258584
GO:0045595	regulation of cell differentiation	112	684	86.1488	1.389	0.00175031	0.367977	0.00323793
GO:0051937	catecholamine transport	12	38	4.78604	3.22142	0.00176851	0.359391	0.160377
GO:0000904	cell morphogenesis involved in differentiation	93	552	69.5236	1.43405	0.00176963	0.225945	0.177284
GO:0015844	monoamine transport	14	48	6.04553	2.87573	0.0017861	0.226358	0.00922414
GO:0034654	nucleobase-containing biosynthetic process	53	283	35.6434	1.62199	0.00180668	0.0581851	0.00131637
GO:0048589	developmental growth	40	200	25.1897	1.75588	0.00185261	0.332897	0.434393
GO:0030949	positive regulation of vascular endothelial growth factor receptor signaling pathway	6	12	1.51138	6.96453	0.00185488	0.731711	0.530386
GO:0034765	regulation of ion transmembrane transport	17	64	8.06071	2.52811	0.00189343	0.664725	0.000154492
GO:0032989	cellular component morphogenesis	116	714	89.9273	1.37641	0.00192463	0.047283	0.0188998
GO:0000902	cell morphogenesis	111	679	85.5191	1.38584	0.00193819	0.0280098	0.0319703
GO:0016056	rhodopsin mediated signaling pathway	3	3	0.377846	Inf	0.0019943	0.030064	0.225441
GO:0060665	regulation of branching involved in salivary gland morphogenesis by mesenchymal-epithelial signaling	3	3	0.377846	Inf	0.0019943		0.225441
GO:0071883	activation of MAPK activity by adrenergic receptor signaling pathway	3	3	0.377846	Inf	0.0019943	0.280203	0.225441
GO:0009584	detection of visible light	7	16	2.01518	5.41901	0.00201244	0.227032	0.0843183
GO:0007420	brain development	65	364	45.8453	1.53262	0.00205967	0.967974	0.651066
GO:0048518	positive regulation of biological process	369	2584	325.451	1.20969	0.00206426	0.374638	0.0296253
GO:0030534	adult behavior	18	70	8.8164	2.41992	0.00209897	0.0552014	0.299566
GO:0045927	positive regulation of growth	24	104	13.0986	2.10021	0.00212738	0.281007	0.0228318
GO:0071363	cellular response to growth factor stimulus	24	104	13.0986	2.10021	0.00212738	0.858422	0.367966
GO:0050678	regulation of epithelial cell proliferation	32	152	19.1442	1.86988	0.00218813	0.72149	0.0860203
GO:0006836	neurotransmitter transport	26	116	14.61	2.02324	0.00220863	0.428728	0.00316912
GO:0045807	positive regulation of endocytosis	14	49	6.17148	2.79329	0.00221587	0.969169	0.048698
GO:0070887	cellular response to chemical stimulus	162	1046	131.742	1.30611	0.00224291	0.00139429	1.59846e-07
GO:0007411	axon guidance	55	299	37.6586	1.58663	0.00226697	0.193592	0.238487
GO:2000021	regulation of ion homeostasis	22	93	11.7132	2.16814	0.00229637	0.638541	0.000563616
GO:0090066	regulation of anatomical structure size	42	215	27.0789	1.70531	0.0023073	0.0567897	0.00537285
GO:0002376	immune system process	207	1375	173.179	1.26838	0.00231415	0.00069768	4.38819e-09
GO:0048667	cell morphogenesis involved in neuron differentiation	79	461	58.0623	1.46037	0.00239162	0.28035	0.425676
GO:0007602	phototransduction	9	25	3.14871	3.92182	0.00239962	0.4886	0.212701
GO:0002526	acute inflammatory response	20	82	10.3278	2.25603	0.00242674	0.0417808	3.30966e-05
GO:0045597	positive regulation of cell differentiation	64	360	45.3415	1.5237	0.00247807	0.230792	0.0695032
GO:0048858	cell projection morphogenesis	87	517	65.1154	1.43	0.00254179	0.057669	0.260554
GO:0019317	fucose catabolic process	5	9	1.13354	8.70136	0.00255686	0.238251	0.556973
GO:0042355	L-fucose catabolic process	5	9	1.13354	8.70136	0.00255686	0.238251	0.556973
GO:0050908	detection of light stimulus involved in visual perception	5	9	1.13354	8.70136	0.00255686	0.238251	0.0285239
GO:0050962	detection of light stimulus involved in sensory perception	5	9	1.13354	8.70136	0.00255686	0.238251	0.0285239
GO:0009725	response to hormone stimulus	102	622	78.34	1.38872	0.00263908	0.00313245	2.69627e-08
GO:0002688	regulation of leukocyte chemotaxis	13	45	5.66768	2.8358	0.00282755	0.039029	0.00807181
GO:0042246	tissue regeneration	11	35	4.4082	3.19746	0.00283884	0.149303	0.0442555
GO:0090276	regulation of peptide hormone secretion	26	118	14.8619	1.97886	0.00284006	0.967951	0.107245
GO:0055080	cation homeostasis	61	342	43.0744	1.52883	0.00285833	0.0120618	3.24167e-05
GO:0055085	transmembrane transport	132	837	105.419	1.32948	0.0029785	4.61942e-06	2.15731e-07
GO:0048545	response to steroid hormone stimulus	52	283	35.6434	1.5832	0.00301069	0.00235825	4.01223e-08
GO:0008343	adult feeding behavior	4	6	0.755691	13.9153	0.00304436	0.121768	0.595845
GO:0010898	positive regulation of triglyceride catabolic process	4	6	0.755691	13.9153	0.00304436	0.121768	0.0764948
GO:0034447	very-low-density lipoprotein particle clearance	4	6	0.755691	13.9153	0.00304436		0.0764948
GO:0042492	gamma-delta T cell differentiation	4	6	0.755691	13.9153	0.00304436		0.0764948
GO:0045586	regulation of gamma-delta T cell differentiation	4	6	0.755691	13.9153	0.00304436		0.0764948
GO:0045588	positive regulation of gamma-delta T cell differentiation	4	6	0.755691	13.9153	0.00304436		0.0764948
GO:0051481	reduction of cytosolic calcium ion concentration	4	6	0.755691	13.9153	0.00304436	0.481939	0.0764948
GO:0060384	innervation	4	6	0.755691	13.9153	0.00304436		0.889738
GO:0001516	prostaglandin biosynthetic process	7	17	2.14113	4.87662	0.00305266	0.539348	0.117773
GO:0006004	fucose metabolic process	7	17	2.14113	4.87662	0.00305266	0.25598	0.117773
GO:0035812	renal sodium excretion	7	17	2.14113	4.87662	0.00305266	0.844999	0.000832912
GO:0035813	regulation of renal sodium excretion	7	17	2.14113	4.87662	0.00305266	0.844999	0.000832912
GO:0046457	prostanoid biosynthetic process	7	17	2.14113	4.87662	0.00305266	0.539348	0.117773
GO:0014821	phasic smooth muscle contraction	6	13	1.63733	5.969	0.00307998	0.397198	0.181018
GO:0007243	intracellular protein kinase cascade	104	640	80.6071	1.37341	0.00322117	0.00678697	0.000380161
GO:0050673	epithelial cell proliferation	35	175	22.041	1.75319	0.00344734	0.358702	0.0403565
GO:0043491	protein kinase B signaling cascade	16	62	7.80881	2.42967	0.00349003	0.312737	0.0403651
GO:0050795	regulation of behavior	22	96	12.0911	2.07962	0.00349438	0.00922069	0.00250931
GO:0002687	positive regulation of leukocyte migration	13	46	5.79363	2.74959	0.00349566	0.00630115	0.0048197
GO:0008344	adult locomotory behavior	13	46	5.79363	2.74959	0.00349566	0.195568	0.446552
GO:0008284	positive regulation of cell proliferation	85	509	64.1078	1.41569	0.00351674	0.0169368	8.31783e-05
GO:0009583	detection of light stimulus	10	31	3.9044	3.32071	0.003534	0.637949	0.124845
GO:0032990	cell part morphogenesis	87	523	65.8711	1.40943	0.00354136	0.0694989	0.28885
GO:0006163	purine nucleotide metabolic process	101	621	78.214	1.37408	0.0035729	0.111897	0.00444472
GO:0002791	regulation of peptide secretion	26	120	15.1138	1.93637	0.00361832	0.939807	0.0669888
GO:0090087	regulation of peptide transport	26	120	15.1138	1.93637	0.00361832	0.939807	0.0669888
GO:0010951	negative regulation of endopeptidase activity	15	57	7.17907	2.494	0.00377165	0.0305195	0.000458506
GO:0007409	axonogenesis	73	428	53.906	1.44979	0.00387128	0.204234	0.336357
GO:0046883	regulation of hormone secretion	30	145	18.2625	1.82756	0.00387427	0.971105	0.0548556
GO:0050853	B cell receptor signaling pathway	8	22	2.77087	3.98209	0.00388016	0.910473	0.00543151
GO:0042742	defense response to bacterium	21	91	11.4613	2.09789	0.00391136	0.146229	0.0280142
GO:0001775	cell activation	100	616	77.5843	1.37058	0.00395029	0.0466271	4.07329e-07
GO:0007626	locomotory behavior	22	97	12.217	2.05168	0.0039949	0.558422	0.150833
GO:0016337	cell-cell adhesion	49	267	33.6283	1.57952	0.00400056	0.0109404	3.46877e-05
GO:0001505	regulation of neurotransmitter levels	24	109	13.7284	1.97568	0.00407762	0.23835	0.00118921
GO:0019216	regulation of lipid metabolic process	31	152	19.1442	1.79502	0.00421284	0.515727	0.000178887
GO:0050830	defense response to Gram-positive bacterium	9	27	3.40061	3.48537	0.0043595	0.305807	0.043303
GO:0048513	organ development	267	1841	231.871	1.2174	0.00441682	0.677212	5.25559e-07
GO:0042391	regulation of membrane potential	33	165	20.7815	1.75213	0.00442516	0.131689	8.60069e-05
GO:0044062	regulation of excretion	7	18	2.26707	4.43285	0.00445847	0.861111	0.000349311
GO:0050994	regulation of lipid catabolic process	10	32	4.03035	3.16946	0.00457024	0.659642	0.0827804
GO:0002922	positive regulation of humoral immune response	5	10	1.25949	6.96039	0.00458586		0.163257
GO:0032148	activation of protein kinase B activity	5	10	1.25949	6.96039	0.00458586	0.665897	0.0529804
GO:0060396	growth hormone receptor signaling pathway	5	10	1.25949	6.96039	0.00458586		0.163257
GO:0071378	cellular response to growth hormone stimulus	5	10	1.25949	6.96039	0.00458586		0.163257
GO:0042060	wound healing	90	549	69.1457	1.38471	0.00463038	0.0151745	3.21201e-07
GO:0055065	metal ion homeostasis	52	289	36.3991	1.54217	0.00468382	0.0235817	0.000238642
GO:0007617	mating behavior	6	14	1.76328	5.22236	0.00482079	0.784568	0.104305
GO:0071514	genetic imprinting	6	14	1.76328	5.22236	0.00482079	0.784568	0.238552
GO:0032102	negative regulation of response to external stimulus	19	81	10.2018	2.14172	0.00488345	0.858534	0.436873
GO:0050680	negative regulation of epithelial cell proliferation	16	64	8.06071	2.32796	0.00489314	0.344906	0.0188525
GO:0055123	digestive system development	20	87	10.9575	2.08662	0.00502305	0.1135	0.00194003
GO:0051094	positive regulation of developmental process	80	481	60.5812	1.40704	0.00506295	0.195777	0.0195607
GO:0001659	temperature homeostasis	8	23	2.89682	3.71625	0.00530262	0.705646	0.06403
GO:0032312	regulation of ARF GTPase activity	8	23	2.89682	3.71625	0.00530262	0.0828536	0.06403
GO:0090278	negative regulation of peptide hormone secretion	8	23	2.89682	3.71625	0.00530262	0.432514	0.06403
GO:0046483	heterocycle metabolic process	133	858	108.064	1.30079	0.00531952	0.162701	0.0171341
GO:0007169	transmembrane receptor protein tyrosine kinase signaling pathway	86	524	65.997	1.38556	0.00539529	0.269594	0.000983642
GO:0007269	neurotransmitter secretion	18	76	9.57209	2.16828	0.0054444	0.390748	0.00689869
GO:0070372	regulation of ERK1 and ERK2 cascade	18	76	9.57209	2.16828	0.0054444	0.538665	5.52962e-05
GO:0018130	heterocycle biosynthetic process	56	318	40.0516	1.5028	0.00546228	0.199019	0.00417046
GO:0006636	unsaturated fatty acid biosynthetic process	12	43	5.41579	2.70049	0.00551641	0.152874	0.0431903
GO:0009628	response to abiotic stimulus	78	469	59.0699	1.40635	0.0056074	0.225535	0.00216674
GO:0072358	cardiovascular system development	93	574	72.2945	1.36531	0.00564245	0.387708	1.75084e-06
GO:0072359	circulatory system development	93	574	72.2945	1.36531	0.00564245	0.387708	1.75084e-06
GO:0071825	protein-lipid complex subunit organization	9	28	3.52656	3.3016	0.00571899	0.15884	0.0586849
GO:0071827	plasma lipoprotein particle organization	9	28	3.52656	3.3016	0.00571899	0.15884	0.0586849
GO:0033555	multicellular organismal response to stress	11	38	4.78604	2.84133	0.00573912	0.196597	0.00142948
GO:0006875	cellular metal ion homeostasis	49	272	34.258	1.54331	0.00578783	0.0350535	0.000596678
GO:0055067	monovalent inorganic cation homeostasis	14	54	6.80122	2.4429	0.00583038	0.494792	4.2657e-05
GO:0030030	cell projection organization	108	681	85.771	1.33292	0.00584959	0.127528	0.0982286
GO:0051130	positive regulation of cellular component organization	57	326	41.0592	1.48984	0.00593388	0.961892	0.5807
GO:0048522	positive regulation of cellular process	334	2359	297.113	1.18815	0.00607677	0.655541	0.180907
GO:0019318	hexose metabolic process	41	220	27.7087	1.60678	0.00611858	0.691458	0.0965897
GO:0015850	organic alcohol transport	13	49	6.17148	2.5197	0.00629793	0.399779	0.0866307
GO:0002685	regulation of leukocyte migration	15	60	7.55691	2.32704	0.0063304	0.00757368	0.00315368
GO:0002606	positive regulation of dendritic cell antigen processing and presentation	4	7	0.88164	9.27593	0.00639612	0.535739	0.00434373
GO:0014049	positive regulation of glutamate secretion	4	7	0.88164	9.27593	0.00639612		0.135842
GO:0051967	negative regulation of synaptic transmission, glutamatergic	4	7	0.88164	9.27593	0.00639612	0.535739	0.686226
GO:0021700	developmental maturation	25	119	14.9879	1.86058	0.00647976	0.250843	0.163121
GO:0009887	organ morphogenesis	95	592	74.5615	1.34951	0.00680059	0.653153	0.000188247
GO:0032846	positive regulation of homeostatic process	14	55	6.92717	2.38308	0.00693606	0.344073	0.146779
GO:0001817	regulation of cytokine production	48	268	33.7542	1.53181	0.00699639	0.0286769	0.000496473
GO:0002792	negative regulation of peptide secretion	8	24	3.02276	3.48364	0.00709077	0.234003	0.037615
GO:0002690	positive regulation of leukocyte chemotaxis	11	39	4.91199	2.73958	0.00710338	0.0163275	0.00582095
GO:0006721	terpenoid metabolic process	11	39	4.91199	2.73958	0.00710338	0.587309	0.421411
GO:0046888	negative regulation of hormone secretion	11	39	4.91199	2.73958	0.00710338	0.380849	0.00582095
GO:0021533	cell differentiation in hindbrain	6	15	1.88923	4.64163	0.00718866		0.995973
GO:0070328	triglyceride homeostasis	6	15	1.88923	4.64163	0.00718866	0.471138	0.724562
GO:0007621	negative regulation of female receptivity	3	4	0.503794	20.8605	0.00722503		0.0894112
GO:0009730	detection of carbohydrate stimulus	3	4	0.503794	20.8605	0.00722503
GO:0009732	detection of hexose stimulus	3	4	0.503794	20.8605	0.00722503
GO:0032849	positive regulation of cellular pH reduction	3	4	0.503794	20.8605	0.00722503	0.354933	0.0894112
GO:0034287	detection of monosaccharide stimulus	3	4	0.503794	20.8605	0.00722503
GO:0035624	receptor transactivation	3	4	0.503794	20.8605	0.00722503	0.354933	0.361471
GO:0035625	epidermal growth factor-activated receptor transactivation by G-protein coupled receptor signaling pathway	3	4	0.503794	20.8605	0.00722503	0.354933	0.361471
GO:0045113	regulation of integrin biosynthetic process	3	4	0.503794	20.8605	0.00722503	0.354933	0.0894112
GO:0051594	detection of glucose	3	4	0.503794	20.8605	0.00722503
GO:0060437	lung growth	3	4	0.503794	20.8605	0.00722503		0.770023
GO:0071702	organic substance transport	73	439	55.2914	1.40461	0.00723967	0.0106037	5.20666e-05
GO:0051970	negative regulation of transmission of nerve impulse	10	34	4.28225	2.90475	0.0073474	0.475954	0.129422
GO:0030100	regulation of endocytosis	19	84	10.5797	2.04226	0.00738248	0.979671	0.0588007
GO:0031294	lymphocyte costimulation	15	61	7.68286	2.27622	0.00744119	0.449698	0.0951892
GO:0031295	T cell costimulation	15	61	7.68286	2.27622	0.00744119	0.449698	0.0951892
GO:0031344	regulation of cell projection organization	34	177	22.2929	1.66568	0.00745147	0.757212	0.738043
GO:0070371	ERK1 and ERK2 cascade	20	90	11.3354	1.99659	0.00746417	0.460007	0.000500029
GO:0002407	dendritic cell chemotaxis	5	11	1.38543	5.79975	0.00754271	0.700605	0.452326
GO:0002861	regulation of inflammatory response to antigenic stimulus	5	11	1.38543	5.79975	0.00754271		0.452326
GO:0006349	regulation of gene expression by genetic imprinting	5	11	1.38543	5.79975	0.00754271		0.452326
GO:0035815	positive regulation of renal sodium excretion	5	11	1.38543	5.79975	0.00754271	0.700605	0.00506423
GO:0045885	positive regulation of survival gene product expression	5	11	1.38543	5.79975	0.00754271	0.700605	0.226915
GO:0051491	positive regulation of filopodium assembly	5	11	1.38543	5.79975	0.00754271	0.700605	0.452326
GO:0043408	regulation of MAPKKK cascade	43	236	29.7239	1.56293	0.00763383	0.253406	2.97045e-05
GO:0030003	cellular cation homeostasis	53	303	38.1624	1.48918	0.00771483	0.0311885	0.000559156
GO:0007167	enzyme linked receptor protein signaling pathway	109	696	87.6602	1.31221	0.0082381	0.333542	0.00191168
GO:0002675	positive regulation of acute inflammatory response	7	20	2.51897	3.75012	0.0086592	0.344741	0.0559216
GO:0055078	sodium ion homeostasis	7	20	2.51897	3.75012	0.0086592	0.629715	0.000343482
GO:0046456	icosanoid biosynthetic process	11	40	5.03794	2.64485	0.00870798	0.230838	0.0401176
GO:0065009	regulation of molecular function	205	1402	176.58	1.2197	0.00905963	0.386997	8.51926e-05
GO:0010907	positive regulation of glucose metabolic process	8	25	3.14871	3.27839	0.00929836	0.748707	0.688711
GO:0010676	positive regulation of cellular carbohydrate metabolic process	9	30	3.77846	2.98656	0.0093936	0.83327	0.74788
GO:0045913	positive regulation of carbohydrate metabolic process	9	30	3.77846	2.98656	0.0093936	0.83327	0.74788
GO:0048708	astrocyte differentiation	9	30	3.77846	2.98656	0.0093936	0.83327	0.446506
GO:0072521	purine-containing compound metabolic process	102	649	81.7406	1.31642	0.00941217	0.114218	0.00763179
GO:0046165	alcohol biosynthetic process	21	98	12.343	1.90583	0.00952519	0.439571	0.00108384
GO:0033559	unsaturated fatty acid metabolic process	14	57	7.17907	2.27178	0.00964512	0.0667052	0.00608441
GO:0050921	positive regulation of chemotaxis	14	57	7.17907	2.27178	0.00964512	0.0667052	0.00608441
GO:0051707	response to other organism	71	431	54.2838	1.38774	0.00993711	0.00722237	0.00119304
GO:0050794	regulation of cellular process	806	6068	764.256	1.14256	0.00995197	0.96851	0.629557
