# Supplementary material for: A heterozygous IDH1R132H/WT mutation induces genome-wide alterations in DNA methylation
Source: HighWire-hosted journal article supplement (doi:10.1101/gr.132738.111), 2012-08-16
Supplement: Sup_Table3.xlsx [file Sup_Table3.xlsx]

## Sheet: Supplementary Table 3
Supplementary Table 3. Gene ontology biological processes associated with HCT116IDH1/WT hypomethylated genes
GOID	Term	Count	Size	ExpCount	OddsRatio	HCT116 p-value	TCGA p-value	Turcan et al. p-value
GO:0060379	cardiac muscle cell myoblast differentiation	3	3	0.172438	Inf	0.00018909		0.200729
GO:0010310	regulation of hydrogen peroxide metabolic process	4	8	0.459834	16.4916	0.000628571		0.449879
GO:0060263	regulation of respiratory burst	4	8	0.459834	16.4916	0.000628571		0.449879
GO:0032570	response to progesterone stimulus	6	23	1.32202	5.83137	0.00153203		0.227262
GO:0014074	response to purine-containing compound	5	16	0.919669	7.50278	0.00158675	0.0343461	0.0241201
GO:0045920	negative regulation of exocytosis	4	10	0.574793	10.9924	0.00171868		0.526256
GO:0008544	epidermis development	23	212	12.1856	2.03147	0.0024814		0.764931
GO:0031000	response to caffeine	4	11	0.632272	9.42116	0.00257876	0.0237365	0.00583289
GO:0007402	ganglion mother cell fate determination	2	2	0.114959	Inf	0.00329914		0.138744
GO:0032682	negative regulation of chemokine production	2	2	0.114959	Inf	0.00329914
GO:0043313	regulation of neutrophil degranulation	2	2	0.114959	Inf	0.00329914
GO:0043314	negative regulation of neutrophil degranulation	2	2	0.114959	Inf	0.00329914
GO:0046125	pyrimidine deoxyribonucleoside metabolic process	2	2	0.114959	Inf	0.00329914
GO:0006119	oxidative phosphorylation	8	45	2.58657	3.5767	0.00371137		0.638004
GO:0072523	purine-containing compound catabolic process	37	407	23.3941	1.67781	0.00375613		0.0583157
GO:0006753	nucleoside phosphate metabolic process	59	726	41.73	1.49476	0.00410028	0.475972	0.175772
GO:0009117	nucleotide metabolic process	59	726	41.73	1.49476	0.00410028	0.475972	0.175772
GO:0071900	regulation of protein serine/threonine kinase activity	27	273	15.6918	1.8339	0.00411147		0.500733
GO:0001570	vasculogenesis	8	46	2.64405	3.48225	0.00427172		0.652899
GO:0009259	ribonucleotide metabolic process	40	454	26.0956	1.62206	0.00455824		0.0766532
GO:0050732	negative regulation of peptidyl-tyrosine phosphorylation	4	13	0.747231	7.32621	0.00509538
GO:0030216	keratinocyte differentiation	10	68	3.90859	2.85532	0.00520049		0.876316
GO:0042532	negative regulation of tyrosine phosphorylation of STAT protein	3	7	0.402355	12.3498	0.00555731
GO:0006195	purine nucleotide catabolic process	36	403	23.1642	1.64364	0.00558341		0.051724
GO:0043405	regulation of MAP kinase activity	20	188	10.8061	1.98189	0.00573068		0.708892
GO:0006469	negative regulation of protein kinase activity	14	115	6.61012	2.30056	0.00612297		0.923826
GO:0009913	epidermal cell differentiation	11	81	4.65582	2.60353	0.00640755		0.93748
GO:0010001	glial cell differentiation	13	105	6.03532	2.34355	0.00703927	0.205669	0.00798136
GO:0071901	negative regulation of protein serine/threonine kinase activity	10	71	4.08103	2.71414	0.00708099		0.58613
GO:2000377	regulation of reactive oxygen species metabolic process	7	40	2.29917	3.50488	0.00711466		0.793673
GO:0045682	regulation of epidermis development	5	22	1.26454	4.85204	0.00718325		0.806889
GO:0006120	mitochondrial electron transport, NADH to ubiquinone	6	31	1.78186	3.96239	0.00755552		0.901548
GO:0043161	proteasomal ubiquitin-dependent protein catabolic process	18	168	9.65652	1.99488	0.00791548		0.862187
GO:0051348	negative regulation of transferase activity	15	131	7.52979	2.14647	0.00815211	0.249938	0.917132
GO:0009150	purine ribonucleotide metabolic process	38	445	25.5783	1.56347	0.00921233		0.0600819
GO:0009166	nucleotide catabolic process	36	417	23.9689	1.58112	0.00942056		0.0545276
GO:0003188	heart valve formation	2	3	0.172438	32.8919	0.00951925
GO:0010804	negative regulation of tumor necrosis factor-mediated signaling pathway	2	3	0.172438	32.8919	0.00951925
GO:0019405	alditol catabolic process	2	3	0.172438	32.8919	0.00951925
GO:0033484	nitric oxide homeostasis	2	3	0.172438	32.8919	0.00951925		0.200729
GO:0045007	depurination	2	3	0.172438	32.8919	0.00951925
GO:0048552	regulation of metalloenzyme activity	2	3	0.172438	32.8919	0.00951925
GO:0048554	positive regulation of metalloenzyme activity	2	3	0.172438	32.8919	0.00951925
GO:0048619	embryonic hindgut morphogenesis	2	3	0.172438	32.8919	0.00951925
GO:2000134	negative regulation of G1/S transition of mitotic cell cycle	2	3	0.172438	32.8919	0.00951925
