# Supplementary material for: A heterozygous IDH1R132H/WT mutation induces genome-wide alterations in DNA methylation
Source: HighWire-hosted journal article supplement (doi:10.1101/gr.132738.111), 2012-08-16
Supplement: Sup_Table4.xlsx [file Sup_Table4.xlsx]

## Sheet: Supplementary Table 4
Supplementary Table 4. HCT116 IDH1R132H/WT differentially expressed genes
Probe.Set.ID	Gene.Symbol	Entrez.Gene	knockin.t.stat	knockin.p.val	knockin.fold.change	knockin.fdr
200633_at	UBB	7314	-65.1601	3.32e-07	-208.745	3.32e-05
203423_at	RBP1	5947	-14.1564	0.000144553	-2.13522	0.00488015
205110_s_at	FGF13	2258	-14.1107	0.000146405	-2.59711	0.00488015
201667_at	GJA1	2697	-10.7859	0.00041903	-7.97401	0.0104758
201426_s_at	VIM	7431	-8.81646	0.000913304	-3.45367	0.0135144
203964_at	NMI	9111	-8.43646	0.00108115	-1.57631	0.0135144
210445_at	FABP6	2172	-8.73594	0.00094601	-1.82892	0.0135144
219032_x_at	OPN3	23596	-9.15926	0.000788793	-2.12814	0.0135144
202644_s_at	TNFAIP3	7128	-7.36557	0.00181033	-1.87483	0.0201147
202643_s_at	TNFAIP3	7128	-6.55503	0.00280095	-1.60024	0.0279748
204855_at	SERPINB5	5268	-6.39083	0.00307723	-3.49851	0.0279748
206618_at	IL18R1	8809	-5.75381	0.0045245	-1.74518	0.0360653
209443_at	SERPINA5	5104	-5.63228	0.00488927	-2.24619	0.0360653
218532_s_at	FAM134B	54463	-5.58246	0.00504914	-2.59392	0.0360653
203999_at	SYT1	6857	-5.24593	0.00631469	-2.98738	0.0420979
203747_at	AQP3	360	4.92214	0.00791723	2.75021	0.0439846
205767_at	EREG	2069	-4.99657	0.00750865	-8.93866	0.0439846
219836_at	ZBED2	79413	-5.01364	0.00741857	-3.30483	0.0439846
201417_at	SOX4	6659	-4.77267	0.00882278	-1.71153	0.0452918
204844_at	ENPEP	2028	-4.73683	0.00905835	-1.52054	0.0452918
39248_at	AQP3	360	4.6505	0.00965785	2.73767	0.0459898
