# Supplementary material for: A heterozygous IDH1R132H/WT mutation induces genome-wide alterations in DNA methylation
Source: HighWire-hosted journal article supplement (doi:10.1101/gr.132738.111), 2012-08-16
Supplement: Sup_Table5.xlsx [file Sup_Table5.xlsx]

## Sheet: Supplementary Table 5
Supplementary Table 5. Gene Set Enrichment Analysis of Affymetrix gene expression data from HCT116 IDH1R132H/WT knock-in versus HCT116 parental cell lines
Gene sets enriched reflecting gene repression in response to HCT116 IDH1R132H/WT knock-in.
Name	Size	ES	NES	NOM p-val	FDR q-val	FWER p-val
REACTOME_P53_INDEPENDENT_DNA_DAMAGE_RESPONSE	43	0.712312	2.31308	0	0.0288151	0.023
GARGALOVIC_RESPONSE_TO_OXIDIZED_PHOSPHOLIPIDS_BLACK_UP	26	0.793529	2.27217	0	0.0294168	0.048
REACTOME_SCF_BETA_TRCP_MEDIATED_DEGRADATION_OF_EMI1	48	0.69345	2.27216	0	0.0196112	0.048
OUELLET_CULTURED_OVARIAN_CANCER_INVASIVE_VS_LMP_UP	66	0.656971	2.26253	0	0.0168337	0.055
REACTOME_VIF_MEDIATED_DEGRADATION_OF_APOBEC3G	47	0.70874	2.25631	0	0.0153781	0.063
KRIGE_AMINO_ACID_DEPRIVATION	25	0.775107	2.22359	0	0.0232099	0.111
REACTOME_STABILIZATION_OF_P53	45	0.695828	2.20499	0	0.0259048	0.142
REACTOME_SIGNALING_BY_WNT	58	0.636872	2.20148	0	0.0241558	0.151
REACTOME_CDT1_ASSOCIATION_WITH_THE_CDC6_ORC_ORIGIN_COMPLEX	51	0.67155	2.19456	0	0.0243867	0.17
IGARASHI_ATF4_TARGETS_DN	76	0.615331	2.16766	0	0.0327599	0.246
KRIGE_RESPONSE_TO_TOSEDOSTAT_24HR_UP	569	0.475634	2.16678	0	0.0309788	0.254
REACTOME_M_G1_TRANSITION	60	0.630477	2.15793	0	0.0331304	0.288
REACTOME_CHOLESTEROL_BIOSYNTHESIS	20	0.774793	2.14469	0	0.0365799	0.331
REACTOME_ORC1_REMOVAL_FROM_CHROMATIN	62	0.632427	2.12913	0	0.0421308	0.393
REACTOME_AUTODEGRADATION_OF_CDH1_BY_CDH1_APC	53	0.658296	2.12789	0	0.0397217	0.396
REACTOME_SCF_SKP2_MEDIATED_DEGRADATION_OF_P27_P21	52	0.645896	2.12261	0	0.0398758	0.414
REACTOME_EGFR_DOWNREGULATION	22	0.74971	2.10013	0.00622407	0.0494707	0.507
REACTOME_CDC20_PHOSPHO_APC_MEDIATED_DEGRADATION_OF_CYCLIN_A	59	0.621696	2.07189	0	0.0644767	0.615
AMIT_SERUM_RESPONSE_20_MCF10A	20	0.751949	2.07143	0	0.0614591	0.616
Gene sets enriched reflecting gene activation in response to HCT116 IDH1R132H/WT knock-in.
Name	Size	ES	NES	NOM p-val	FDR q-val	FWER p-val
BIOCARTA_DC_PATHWAY	21	-0.705773	-1.98467	0	0.1149	0.129
LIEN_BREAST_CARCINOMA_METAPLASTIC	29	-0.617965	-1.91456	0.00196078	0.165736	0.343
KEGG_ASTHMA	27	-0.647698	-1.90459	0.00184502	0.130005	0.385
LI_WILMS_TUMOR	27	-0.627857	-1.90339	0.00187617	0.0989043	0.387
KLEIN_TARGETS_OF_BCR_ABL1_FUSION	31	-0.595715	-1.84644	0	0.172873	0.655
KEGG_INTESTINAL_IMMUNE_NETWORK_FOR_IGA_PRODUCTION	42	-0.552473	-1.82706	0	0.183341	0.727
PETRETTO_HEART_MASS_QTL_CIS_UP	17	-0.671614	-1.8072	0.00181159	0.198993	0.817
LINDSTEDT_DENDRITIC_CELL_MATURATION_D	58	-0.502825	-1.75373	0.00193424	0.323241	0.961
ELVIDGE_HYPOXIA_BY_DMOG_DN	57	-0.500909	-1.75137	0	0.294824	0.966
MORI_PLASMA_CELL_DN	16	-0.66733	-1.75001	0.0036036	0.270157	0.967
REACTOME_REGULATION_OF_INSULIN_LIKE_GROWTH_FACTOR_ACTIVITY_BY_INSULIN_LIKE_GROWTH_FACTOR_BINDING_PROTEINS	16	-0.657532	-1.74804	0.015873	0.250795	0.969
KEGG_AUTOIMMUNE_THYROID_DISEASE	48	-0.524598	-1.74344	0.0035461	0.240029	0.976
WONG_ENDMETRIUM_CANCER_UP	17	-0.645572	-1.74335	0.00570342	0.221935	0.976
REACTOME_G_ALPHA_Q_SIGNALLING_EVENTS	130	-0.431759	-1.74205	0	0.209747	0.977
KEGG_GRAFT_VERSUS_HOST_DISEASE	36	-0.545592	-1.74061	0.00576923	0.199128	0.977
YU_MYC_TARGETS_DN	38	-0.521289	-1.72804	0.0115163	0.216488	0.99
DASU_IL6_SIGNALING_SCAR_DN	16	-0.646095	-1.72114	0.00957854	0.218305	0.992
REACTOME_ADP_SIGNALLING_THROUGH_P2Y_PURINOCEPTOR_12	16	-0.643501	-1.71269	0.00738007	0.226125	0.992
REACTOME_G_PROTEIN_ACTIVATION	24	-0.580347	-1.71047	0.011194	0.219149	0.992
SABATES_COLORECTAL_ADENOMA_DN	225	-0.381763	-1.66944	0	0.311398	1
