# Supplementary material for: A heterozygous IDH1R132H/WT mutation induces genome-wide alterations in DNA methylation
Source: HighWire-hosted journal article supplement (doi:10.1101/gr.132738.111), 2012-08-16
Supplement: Sup_Table6.xlsx [file Sup_Table6.xlsx]

## Sheet: Sheet1
Supplementary Table 6. Enrichment of molecular concepts for HCT116 IDH1R132H/WT hypermethylated genes
			HCT116 IDH1R132H/WT hypermethylated genes			HCT116 IDH1R132H/WT & astrocyte2 hypermethylated genes			HCT116 IDH1R132H/WT & LGG2 hypermethylated genes
Concept1	Concept genes	Inf27 genes in concept	genes in concept	odds ratio	p-value	genes in concept	odds ratio	p-value	genes in concept	odds ratio	p-value
Trimethylated H3K27 target genes in human embryonic fibroblasts	1580	1040 / 14477 (7.18%)	266 / 1809 (14.7%)	2.65	3.7e-33	53 / 220 (24.09%)	4.15	6.3e-15	133 / 696 (19.11%)	3.25	1.9e-25
CBX8 target genes in human embryonic fibroblasts	1999	1314 / 14477 (9.08%)	278 / 1809 (15.37%)	2.04	1.2e-20	52 / 220 (23.64%)	3.09	2e-10	132 / 696 (18.97%)	2.42	5.9e-16
Trimethylated H3K27 target genes in human embryonic stem cells	717	548 / 14477 (3.79%)	122 / 1809 (6.74%)	2.08	6.1e-11	28 / 220 (12.73%)	3.75	3.2e-08	51 / 696 (7.33%)	2.05	9.4e-06
SUZ12 target genes in human embryonic stem cells	653	492 / 14477 (3.4%)	106 / 1809 (5.86%)	1.98	7.7e-09	20 / 220 (9.09%)	2.84	9e-05	41 / 696 (5.89%)	1.8	0.00072
EED target genes in human embryonic fibroblasts	868	673 / 14477 (4.65%)	129 / 1809 (7.13%)	1.71	2.8e-07	30 / 220 (13.64%)	3.25	2e-07	50 / 696 (7.18%)	1.59	0.0025
SUZ12 target genes in human embryonic fibroblasts	709	486 / 14477 (3.36%)	115 / 1809 (6.36%)	2.25	3.8e-12	26 / 220 (11.82%)	3.91	4.1e-08	56 / 696 (8.05%)	2.64	2.5e-09
Polycomb Group target genes in human embryonic stem cells	528	411 / 14477 (2.84%)	92 / 1809 (5.09%)	2.07	1.1e-08	20 / 220 (9.09%)	3.45	7e-06	36 / 696 (5.17%)	1.9	0.00061
1Concepts are publicaly available at oncomine.org
2 Genes hypermethylated in astrocytes expressing IDH1-R132H and CIMP+ low grade gliomas are those described in: Turcan S, Rohle D, Goenka A, Walsh LA, Fang F, Yilmaz E, Campos C, Fabius AW, Lu C, Ward PS et al. 2012. Nature 483:474-8
